# Supplementary material
Source: MDPI journal article supplement (https://www.mdpi.com/2035-8377/15/4/76)
Supplement: s1 [file s1]

---

# Supplementary Material: Targeting Neutrophil Extracellular Traps for Stroke Prognosis: A Promising Path.

Eirini Liaptsi, Ermis Merkouris, Efthymia Polatidou, Dimitrios Tsiptsios, Aimilios Gkantzos, Christos Kokkotis, Foivos Petridis, Foteini Christidi, Stella Karatzetzou, Christos Karaoglanis, Anna-Maria Tsagkalidi, Nikolaos Chouliaras, Konstantinos Tsamakis, Maria Protopapa, Dimitrios Pantazis-Pergaminelis, Panagiotis Skendros, Nikolaos Aggelousis and Konstantinos Vadikolias

**Table S1.** Basic characteristics of the 33 included studies.

| Author,<br>Year of<br>Publication | Type of study-<br>Duration                     | Type<br>of<br>stroke | Biomarker                                                                     | Patient Group &<br>Intervention                                                                                                                                                                                                                                                                             | Scale of stroke<br>severity              | Sample                   | Time of sampling                               | Main Findings                                         | Study Weakness                            |
|-----------------------------------|------------------------------------------------|----------------------|-------------------------------------------------------------------------------|-------------------------------------------------------------------------------------------------------------------------------------------------------------------------------------------------------------------------------------------------------------------------------------------------------------|------------------------------------------|--------------------------|------------------------------------------------|-------------------------------------------------------|-------------------------------------------|
| Pir et al.<br>2022 [27]           | Prospective<br><br>July 2019 –<br>January 2021 | AIS                  | NET-markers<br>(H3Cit, NE, MPO)<br><br>in AIS patients<br><br>derived thrombi | LVO patients who<br><br>underwent<br><br>thrombectomy<br><br>$n = 21$<br><br>mean age = $50.73 \pm$<br><br>11.04<br><br><u>Group 1:</u><br><br>Thrombolysis<br><br>followed by<br><br>thrombectomy,<br><br>$n = 10$<br><br><u>Group 2:</u><br><br>Thrombectomy<br><br>without<br><br>thrombolysis, $n = 11$ | NIHSS<br><br>TOAST<br><br>classification | Arterial<br><br>thrombus | During<br><br>endovascular<br><br>thrombectomy | Abundant NET formation in<br><br>AIS patients thrombi | Small sample size<br><br>No control group |

|                        |                                                |     |                                                      |                                                                                                                                                                                                                                                                                                         |                                                              |                   |                                               |                                                                                                                                                                                                                                                                                                                                                                                                                                                                                                                                                                                                                                                                                                                       |                                                  |
|------------------------|------------------------------------------------|-----|------------------------------------------------------|---------------------------------------------------------------------------------------------------------------------------------------------------------------------------------------------------------------------------------------------------------------------------------------------------------|--------------------------------------------------------------|-------------------|-----------------------------------------------|-----------------------------------------------------------------------------------------------------------------------------------------------------------------------------------------------------------------------------------------------------------------------------------------------------------------------------------------------------------------------------------------------------------------------------------------------------------------------------------------------------------------------------------------------------------------------------------------------------------------------------------------------------------------------------------------------------------------------|--------------------------------------------------|
| Cha et al.2022<br>[33] | Prospective<br><br>December 2017<br>– May 2020 | AIS | Neutrophil fractions in thrombi, NE as a NETs marker | <p>LVO patients who underwent thrombectomy<br/><math>n = 75</math></p> <p><u>Group 1:</u><br/>Lower neutrophil fraction<br/><math>n = 38</math><br/>mean age =76.5<br/>(61.0–84.0)</p> <p><u>Group 2:</u><br/>Higher neutrophil fraction<br/><math>n = 37</math><br/>mean age =78.0<br/>(71.0–85.0)</p> | <p>mRS at 3 months</p> <p>NIHSS at admission</p> <p>TICI</p> | Arterial thrombus | During intra-arterial mechanical thrombectomy | <p>1. <b>Higher</b> neutrophil fraction in patients with <b>poor outcomes</b> (30.0 (IQR 20.9–33.3)) than in patients with good outcomes (23.6 (IQR 10.9–30.1)) (<math>p = 0.023</math>) at 3 months</p> <p>2. NIHSS in <b>Lower</b> neutrophil<br/>Group = <b>13.0</b> [10.0–18.0] VS<br/>NIHSS in <b>Higher</b> neutrophil<br/>Group = <b>15.0</b> [10.0–20.0]</p> <p>3. Successful recanalization (TICI 2b or 3) <math>p = 0.646</math> and onset-to-recanalization time (<math>p = 0.491</math>) did not differ between the groups</p> <p><i>Atrial fibrillation was more frequent in the higher neutrophil group (32/37, 86.5%) than in the lower neutrophil group (19/38, 50%) (<math>p = 0.002</math>)</i></p> | <p>Small sample size</p> <p>No control group</p> |
|------------------------|------------------------------------------------|-----|------------------------------------------------------|---------------------------------------------------------------------------------------------------------------------------------------------------------------------------------------------------------------------------------------------------------------------------------------------------------|--------------------------------------------------------------|-------------------|-----------------------------------------------|-----------------------------------------------------------------------------------------------------------------------------------------------------------------------------------------------------------------------------------------------------------------------------------------------------------------------------------------------------------------------------------------------------------------------------------------------------------------------------------------------------------------------------------------------------------------------------------------------------------------------------------------------------------------------------------------------------------------------|--------------------------------------------------|

|                           |                                                              |     |                                           |                                                                                                                                                                                                                                                                                                                                                                    |                    |                                       |                                                                                                      |                                                                                                                                                                                                                                                                       |                                                             |
|---------------------------|--------------------------------------------------------------|-----|-------------------------------------------|--------------------------------------------------------------------------------------------------------------------------------------------------------------------------------------------------------------------------------------------------------------------------------------------------------------------------------------------------------------------|--------------------|---------------------------------------|------------------------------------------------------------------------------------------------------|-----------------------------------------------------------------------------------------------------------------------------------------------------------------------------------------------------------------------------------------------------------------------|-------------------------------------------------------------|
| Huang et al. 2022 [30]    | Observational<br>Prospective<br><br>May 2021 – February 2022 | AIS | NETs markers:<br>MPO-DNA complex<br>H3cit | AIS patients with NIHSS score between 3 and 20<br>$n = 45$<br><u>Group 1:</u><br>Patients receiving Edavarone and conventional treatment<br>$n = 15$<br>mean age = $62.8 \pm 3.4$<br><br><u>Group 2:</u><br>Conventional treatment group<br>$n = 15$<br>mean age = $62.1 \pm 2.6$<br><br><u>Group 3:</u><br>Control group<br>$n = 15$<br>mean age = $55.2 \pm 3.2$ | NIHSS at admission | Peripheral blood                      | At admission within the first 48 h after stroke onset before treatment<br><br>3 days after treatment | Serum levels of MPO-DNA, and citH3 in the conventional treatment group and Eda.B group were higher after stroke onset ( $p < 0.01$ ) compared to controls<br><br>MPO-DNA, and citH3 in the Eda.B group decreased on the third day after being hospitalized $p < 0.01$ | Small sample size<br>No clinical assessment after admission |
| De Vries et al. 2022 [31] | Prospective multicenter<br><br>September                     | IS  | NETs markers:<br>MPO-DNA complexes        | Patients with TIA, amaurosis fugax, or minor stroke with mRS $\leq 3$ )<br><br>AND                                                                                                                                                                                                                                                                                 | mRS                | Blood sampling (Platelet-poor plasma) | Three months after experiencing neurological symptoms due to ischemia                                | High levels of NETs were non significantly associated with more                                                                                                                                                                                                       | Small sample size<br>Sampling distal to ischemic event      |

|                              |                             |     |                                                         |                                                                                                                                                                                                                                                                                                                                                                                |                                   |                                              |                                                   |                                                                                                                                                                                                                      |                                                            |
|------------------------------|-----------------------------|-----|---------------------------------------------------------|--------------------------------------------------------------------------------------------------------------------------------------------------------------------------------------------------------------------------------------------------------------------------------------------------------------------------------------------------------------------------------|-----------------------------------|----------------------------------------------|---------------------------------------------------|----------------------------------------------------------------------------------------------------------------------------------------------------------------------------------------------------------------------|------------------------------------------------------------|
|                              | 2010 –<br>December 2014     |     | Histone-<br>complexed DNA<br>fragments<br>(histone-DNA) | stenosis of the<br>ipsilateral carotid<br>artery above 30%<br>and below 70%<br><br>$n = 182$<br>mean age $=67 \pm 9$<br><br><u>Group 1:</u><br>Younger patients,<br>with no history of<br>statin or<br>antithrombotic<br>treatment<br>$n = 72$<br><br><u>Group 2:</u><br>Older patients under<br>statin or<br>antithrombotic<br>treatment<br>prior to index event<br>$n = 109$ |                                   |                                              |                                                   | vulnerable atherosclerotic<br>plaques ( $p = 0.18$ )<br><br>In the subgroup of<br>patients naive to statins or<br>antithrombotic medication,<br>the above finding was<br>statistically significant<br>( $p = 0.04$ ) |                                                            |
| Datsi et al.<br>2022<br>[22] | Prospective<br>case-control | AIS | Neutrophils count,<br>DNase-I, LDG                      | <u>Group 1:</u><br>AIS patients<br>undergone                                                                                                                                                                                                                                                                                                                                   | NIHSS at<br>admission<br><br>TICI | Peripheral blood<br><br>Retrieved<br>thrombi | Peripheral blood:<br>Prior to MT<br><br>Thrombus: | . significantly elevated levels<br>of absolute granulocyte<br>count                                                                                                                                                  | Small sample size<br><br>No information about<br>long term |

|                        |                                                                                   |     |                 |                                                                                                                                                                                  |                                                                                              |       |                                          |                                                                                                                                                                                                                                                                                                                                                                                                                                                                 |                                                                                                   |
|------------------------|-----------------------------------------------------------------------------------|-----|-----------------|----------------------------------------------------------------------------------------------------------------------------------------------------------------------------------|----------------------------------------------------------------------------------------------|-------|------------------------------------------|-----------------------------------------------------------------------------------------------------------------------------------------------------------------------------------------------------------------------------------------------------------------------------------------------------------------------------------------------------------------------------------------------------------------------------------------------------------------|---------------------------------------------------------------------------------------------------|
|                        | February – May 2018                                                               |     |                 | <p>MT combined with IVT</p> <p><math>n = 35</math></p> <p>median age= 77 (70.9, 26–98)</p> <p><u>Group 2:</u></p> <p>Healthy controls age matched</p> <p><math>n = 16</math></p> |                                                                                              |       | During MT                                | <p>(<math>p = 0.007</math>), DNase-I (<math>p &lt; 0.001</math>)</p> <p>In AIS patients peripheral blood compared to controls</p> <p>2.increased DNase-I levels (<math>p = 0.045</math>)</p> <p>in sera / increased NET formation in thrombi (<math>p = 0.032</math>)</p> <p>In AIS patients with time passed from symptom onset &gt;4.5 hours</p> <p>3. significantly lower neutrophil count I patients with NIHSS &lt;5 at admission compared to patients</p> | <p>patients' outcome</p> <p>No information on correlation between treatment received and NETs</p> |
| Witsch et al.2022 [42] | <p>Prospective, observational single-center</p> <p>July 2018 – September 2020</p> | SAH | MPO-DNA complex | <p>Patients with spontaneous SAH</p> <p><math>n = 78</math></p> <p>mean age =59.0 (13.0)</p> <p><u>Group 1:</u></p> <p>Patients with Delayed Cerebral Ischemia.</p>              | <p>Glasgow Coma Scale (GCS) scores</p> <p>World Federation of Neurosurgeons Scale (WFNS)</p> | Serum | <p>At admission (day 0) and on day 4</p> | <p>High levels of MPO-DNA complexes in all patients with aSAH</p> <p>No difference for MPO-DNA levels at admission between those with DCI and those without DCI (<math>p = 0.6</math>) and</p>                                                                                                                                                                                                                                                                  | <p>Only Netosis marker examined : MPO-DNA complexes</p> <p>No clinical outcome measured</p>       |

|                          |                                         |     |                                                                                                                    |                                                                                                                                                                                               |                                                                       |                                               |                                                                                                                                                                                              |                                                                                                                                                                                                                                                                                                                                                                                                                                                                          |                                                                                                                               |
|--------------------------|-----------------------------------------|-----|--------------------------------------------------------------------------------------------------------------------|-----------------------------------------------------------------------------------------------------------------------------------------------------------------------------------------------|-----------------------------------------------------------------------|-----------------------------------------------|----------------------------------------------------------------------------------------------------------------------------------------------------------------------------------------------|--------------------------------------------------------------------------------------------------------------------------------------------------------------------------------------------------------------------------------------------------------------------------------------------------------------------------------------------------------------------------------------------------------------------------------------------------------------------------|-------------------------------------------------------------------------------------------------------------------------------|
|                          |                                         |     |                                                                                                                    | <p><math>n = 29</math><br/>mean age =59.7 (12.6)</p> <p><u>Group 2:</u><br/>Patients with no<br/>Delayed Cerebral<br/>Ischemia.<br/><math>n = 49</math><br/>mean age =58.6 (13.3)</p>         | Hunt & Hess<br>scale                                                  |                                               |                                                                                                                                                                                              | <p>those with and without<br/>clinical vasospasm (<math>p = 0.5</math>).</p> <p>MPO-DNA levels between<br/>admission and day 4 reduced<br/>in patients with DCI (<math>p = 0.04</math>), but not in those<br/>without DCI (<math>p = 0.17</math>)</p> <p>MPO-DNA levels between<br/>admission and day 4 reduced<br/>in patients with clinical<br/>vasospasm (<math>p = 0.006</math>), but<br/>not in those without clinical<br/>vasospasm<br/>(<math>p = 0.5</math>)</p> | <p>No healthy control<br/>group</p> <p>No systematic<br/>adjustments to other<br/>variables potentially<br/>affecting DCI</p> |
| Denorme et al. 2022 [43] | Prospective<br>June 2018 –<br>June 2021 | AIS | Brain tissue NE,<br>MPO, H3cit<br><br>MPO-DNA<br>complexes<br><br>NET degradation<br>potential (DNase<br>activity) | <p>Brain tissue:3<br/>patients who<br/>died after AIS<br/>average age = 81</p> <p>Peripheral blood:<br/><u>Group 1:</u> Stroke<br/>patients<br/><math>n = 27</math><br/>mean age =63 ± 15</p> | NIHSS at<br>admission 3 (0–<br>17)<br><br>mRS at<br>discharge 2 (0–5) | Brain tissue<br>samples<br><br>Plasma samples | <p>Brain tissue<br/>samples:<br/>within 24 hours<br/>postmortem for 2<br/>samples and 48<br/>hours<br/>for 1 sample</p> <p>Plasma samples:<br/>within 48 hours of<br/>hospital admission</p> | <p>NETs are present in brain<br/>tissue from ischemic stroke<br/>patients</p> <p>Both plasma H3cit and MPO-<br/>DNA levels positively<br/>correlated with stroke<br/>outcomes (<math>r = 0.45</math>, <math>p = 0.024</math>,<br/>and <math>r = 0.507</math>, <math>p = 0.01</math>,<br/>respectively)</p>                                                                                                                                                               | <p>Small sample size</p> <p>No assessment of<br/>stroke severity at<br/>admission</p>                                         |

|                              |                                                                 |     |                                                      |                                                                                      |               |               |                                                      |                                                                                                                                                                                                                                                                                                                                                                                                                                            |                                                                              |
|------------------------------|-----------------------------------------------------------------|-----|------------------------------------------------------|--------------------------------------------------------------------------------------|---------------|---------------|------------------------------------------------------|--------------------------------------------------------------------------------------------------------------------------------------------------------------------------------------------------------------------------------------------------------------------------------------------------------------------------------------------------------------------------------------------------------------------------------------------|------------------------------------------------------------------------------|
|                              |                                                                 |     |                                                      | <u>Group 2:</u> Healthy donors<br>$n = 27$<br>mean age = $55 \pm 15$                 |               |               |                                                      |                                                                                                                                                                                                                                                                                                                                                                                                                                            |                                                                              |
| Molek et al<br>2022<br>[41]  | Prospective<br><br>Not mentioned                                | IS  | H3cit, MPO                                           | Anticoagulated patients with atrial fibrillation<br><br>$n = 243$<br>median age = 69 | Not mentioned | Serum samples | Not mentioned                                        | Ischemic cerebrovascular events were observed in 20 patients (1.9%/year) who had at baseline higher H3cit, and MPO levels.<br><br>The independent predictors of ischemic stroke/TIA were H3cit (hazard ratio [HR] 9.48, 95% confidence interval [CI] 3.88–22.41, $p < 0.0001$ ) and VWF (HR 1.20, 95% CI 1.11–1.49, $p = 0.001$ ).<br><br>Major bleeding (2.0%/year) and all-cause mortality (1.9%/year) were not related to NETs markers. | No multivariate analysis                                                     |
| Desilles et al. 2022<br>[19] | Prospective monocentric<br><br>March 15, 2020<br>– May 30, 2021 | AIS | Neutrophil levels<br><br>NET markers (MPO, DNA ctH3) | <u>Group 1:</u><br>Consecutive COVID-19 positive patients<br>$n = 14$                | NIHSS         | Thrombi       | At the end of endovascular therapy-retrieved thrombi | COVID-19 patients median NIHSS= 23 (17–25)<br>Non-COVID-19 patients median NIHSS= 16 (13–21)                                                                                                                                                                                                                                                                                                                                               | Neutrophil and/ or NETs markers levels not quantifiable<br>Small sample size |



|                         |                                                                                                                                 |     |                             |                                                                                                                                                                                                                                                                                                                      |                         |                                              |                                                                                                   |                                                                                                                                                                                                                                                                                                                                                                                                  |                                                                                                                                                                       |
|-------------------------|---------------------------------------------------------------------------------------------------------------------------------|-----|-----------------------------|----------------------------------------------------------------------------------------------------------------------------------------------------------------------------------------------------------------------------------------------------------------------------------------------------------------------|-------------------------|----------------------------------------------|---------------------------------------------------------------------------------------------------|--------------------------------------------------------------------------------------------------------------------------------------------------------------------------------------------------------------------------------------------------------------------------------------------------------------------------------------------------------------------------------------------------|-----------------------------------------------------------------------------------------------------------------------------------------------------------------------|
|                         |                                                                                                                                 |     |                             | <p>median age= 59 (52–72)</p> <p><u>Group 2:</u><br/>Non-COVID-19 patients<br/><math>n = 16</math><br/>median age= 67 (57–76)</p>                                                                                                                                                                                    |                         |                                              |                                                                                                   | <p>No difference in neutrophils and NETs markers levels in thrombi Retrieved from non-COVID-19 and COVID-19 patients.</p>                                                                                                                                                                                                                                                                        | <p>Possible endothelial changes not reported, as a counfounding factor in AIS occurrence</p> <p>No clear association reported between COVID-19 infection and AIS.</p> |
| Genchi et al. 2022 [11] | <p>Prospective multicenter</p> <p>February 2020 –March 2021 for COVID-19 patients</p> <p>July 2016 – November 2019 controls</p> | AIS | <p>H3cit<br/>MPO+ cells</p> | <p><u>Group1:</u><br/>Patients with COVID-19 and concomitant LVO-AIS treated with MT<br/><math>n = 7</math><br/>mean age = <math>70.9 \pm 12.4</math></p> <p><u>Group 2:</u><br/>COVID-19-negative (control) patients with LVO-AIS, treated by MT<br/>mean age = <math>74.7 \pm 9.6</math></p> <p><u>Group3:</u></p> | <p>NIHSS</p> <p>mRS</p> | <p>Cerebral thrombi</p> <p>Blood samples</p> | <p>Thrombi:<br/>During MT procedure</p> <p>Blood samples:<br/>48 h from stroke symptoms onset</p> | <p>The number of neutrophils (MPO+ cells) was significantly higher in the thrombi of COVID-19 patients than controls (respectively, median MPO+ cells/mm<sup>2</sup> = 2110, [IQR1754–2580] vs. 1333, [IQR1060–2082], <math>p = 0.04</math>)</p> <p>The content of NETs was not significantly different between the two groups (in COVID-19, the median citH3+ area was 8.66% of total area,</p> | <p>Small sample size of COVID-19 thrombi</p>                                                                                                                          |

|                       |                                  |     |                   |                                                                                                                    |                                    |               |                                 |                                                                                                                                                                                                                                                                                                                                                                                                                                                                                             |                 |
|-----------------------|----------------------------------|-----|-------------------|--------------------------------------------------------------------------------------------------------------------|------------------------------------|---------------|---------------------------------|---------------------------------------------------------------------------------------------------------------------------------------------------------------------------------------------------------------------------------------------------------------------------------------------------------------------------------------------------------------------------------------------------------------------------------------------------------------------------------------------|-----------------|
|                       |                                  |     |                   | LVO-AIS patients with recent pre-stroke infections (present at stroke symptom onset) and not related to SARSCoV-2  |                                    |               |                                 | <p>[IQR3.33–12.77] vs. 8.35%, [IQR6.55–50.7] in controls, <math>p = 0.19</math>)</p> <p>Thrombi of COVID-19 patients had a three-fold higher tNLR than control patients (Respectively, median tNLR 30.3, [IQR25.9–44.4] vs. 10.7, [IQR8.1–19.0], <math>p \leq 0.01</math>)</p> <p>COVID-19 patients with thrombi deriving from patients with non-SARS-CoV2 pre-existing infections at stroke onset confirmed the increased neutrophil density and the higher tNLR in the COVID-19 group</p> |                 |
| Zeng et al. 2021 [21] | Prospective<br><br>Not mentioned | SAH | H3cit<br><br>DAPI | <p><u>Group 1:</u><br/>Patients with aneurysmal SAH<br/><math>n = 10</math></p> <p><u>Group 2:</u><br/>Control</p> | Hunt and Hess classification score | Blood samples | Within 24 h after SAH induction | <p>Plasma NET formation (H3cit) was increased in patients with aneurysmal SAH <math>p = 0.0012</math></p> <p>Positive correlation between</p>                                                                                                                                                                                                                                                                                                                                               | - Not mentioned |

|                               |                                                                                |     |                                                                        |                                                                                                                                                                                                                                                                                                                                        |                                                                  |                                     |                                                                     |                                                                                                                                                                                                            |                                                                                                                                                                                                                                                          |
|-------------------------------|--------------------------------------------------------------------------------|-----|------------------------------------------------------------------------|----------------------------------------------------------------------------------------------------------------------------------------------------------------------------------------------------------------------------------------------------------------------------------------------------------------------------------------|------------------------------------------------------------------|-------------------------------------|---------------------------------------------------------------------|------------------------------------------------------------------------------------------------------------------------------------------------------------------------------------------------------------|----------------------------------------------------------------------------------------------------------------------------------------------------------------------------------------------------------------------------------------------------------|
|                               |                                                                                |     |                                                                        | patients $n = 10$                                                                                                                                                                                                                                                                                                                      |                                                                  |                                     |                                                                     | plasma H3cit levels and SAH severity in patients with aneurysmal SAH ( $r = 0.7742$ , $p = 0.0118$ )                                                                                                       |                                                                                                                                                                                                                                                          |
| Abbasi et al.<br>2022<br>[23] | Single-center, retrospective<br><br>October 2016 – November 2020               | AIS | H3Cit                                                                  | <p>AIS patients who underwent MT less than 8 hours from symptom onset</p> <p><u>Group 1:</u> Early (<math>\leq 4</math> hrs.)<br/><math>n = 88</math><br/>mean age = 67.18 (<math>\pm 14.17</math>)</p> <p><u>Group 2:</u> Delayed (<math>&gt; 4</math> hrs.)<br/><math>n = 49</math><br/>mean age = 64.42 (<math>\pm 10.7</math>)</p> | TICI Score                                                       | Thrombi                             | During MT performed less than 8 hours from symptom onset            | <p>H3Cit thrombus fractions were significantly higher in the delayed group</p> <p>Early group (<math>16.31 \pm 19.88</math>)<br/>Delayed group (<math>26.57 \pm 25.9</math>)<br/><math>p = 0.03</math></p> | Study design: single-center, retrospective.<br><br>Thrombus may not always have been removed en bloc and device manipulation during the procedure may cause clot fragmentation and potential embolization, affecting the composition of retrieved clots. |
| Zhang et al.<br>2021<br>[38]  | Prospective<br><br><b>Venous blood samples:</b><br>January 2019 – January 2020 | IS  | NET-DNA complexes (MPO-DNA, NE-DNA, and H3Cit-DNA)<br><br>Plasma cfDNA | <u>Group 1:</u><br>AIS patients -time from symptoms onset to intravenous thrombolysis within 4.5 hours                                                                                                                                                                                                                                 | NIHSS (before and 24 hours after thrombolysis)<br><br>TICI score | Venous blood samples<br><br>Thrombi | <b>Venous blood samples:</b> Before and 24 hours after thrombolysis | AIS patients had higher neutrophil counts than healthy subjects<br>(Controls = $59.78 \pm 4.35$<br>Patients = $75.24 \pm 3.51$ ) $p = 0.046$                                                               | Not mentioned                                                                                                                                                                                                                                            |

|  |                                                                 |  |  |                                                                                                                                                                                                                                                                                                                                                                                                                                                                                                                     |  |  |                                                         |                                                                                                                                                                                                                                                                                                                                                                                                                                                                             |  |
|--|-----------------------------------------------------------------|--|--|---------------------------------------------------------------------------------------------------------------------------------------------------------------------------------------------------------------------------------------------------------------------------------------------------------------------------------------------------------------------------------------------------------------------------------------------------------------------------------------------------------------------|--|--|---------------------------------------------------------|-----------------------------------------------------------------------------------------------------------------------------------------------------------------------------------------------------------------------------------------------------------------------------------------------------------------------------------------------------------------------------------------------------------------------------------------------------------------------------|--|
|  | <p><b>Thrombi collection</b></p> <p>May 2019 – January 2020</p> |  |  | <p><math>n = 60</math></p> <p>median age= <math>68.47 \pm 11.86</math></p> <p><u>Group 1a:</u></p> <p>Reduced NIHSS score 24 hours after thrombolysis-improvement group</p> <p><math>n = 40</math></p> <p><u>Group 1b:</u></p> <p>Unchanged or increased NIHSS score 24 hours after thrombolysis- no-improvement group</p> <p><math>n = 20</math></p> <p><u>Group 2:</u></p> <p>Healthy controls</p> <p><math>n = 30</math></p> <p>male =20</p> <p>mean age =<math>60.58 \pm 8.86</math></p> <p><b>Thrombi:</b></p> |  |  | <p><b>Thrombi:</b> During endovascular thrombectomy</p> | <p>NET markers in AIS patients were escalated when compared to those in healthy individuals</p> <p><math>p &lt; 0.01</math></p> <p>After thrombolysis, a significant increase in the NET markers in the no-improvement group</p> <p><math>p &lt; 0.01</math></p> <p>Circulating NET markers were positively correlated with plasma levels of procoagulant biomarkers indicators (TAT, D-dimer, and Fibrinogen) and fibrinolysis inhibitors</p> <p><math>p = 0.01</math></p> |  |
|--|-----------------------------------------------------------------|--|--|---------------------------------------------------------------------------------------------------------------------------------------------------------------------------------------------------------------------------------------------------------------------------------------------------------------------------------------------------------------------------------------------------------------------------------------------------------------------------------------------------------------------|--|--|---------------------------------------------------------|-----------------------------------------------------------------------------------------------------------------------------------------------------------------------------------------------------------------------------------------------------------------------------------------------------------------------------------------------------------------------------------------------------------------------------------------------------------------------------|--|

|                                                 |                                                        |     |                                                                     |                                                                                                                                                                                                                                                                                                                                                                                                             |               |               |               |                                                                                                                                                                                              |               |
|-------------------------------------------------|--------------------------------------------------------|-----|---------------------------------------------------------------------|-------------------------------------------------------------------------------------------------------------------------------------------------------------------------------------------------------------------------------------------------------------------------------------------------------------------------------------------------------------------------------------------------------------|---------------|---------------|---------------|----------------------------------------------------------------------------------------------------------------------------------------------------------------------------------------------|---------------|
|                                                 |                                                        |     |                                                                     | <p>AIS patients who had undergone endovascular thrombectomy</p> <p><math>n = 30</math></p> <p>male = 18 (60%)</p> <p>mean age = <math>63 \pm 10</math></p>                                                                                                                                                                                                                                                  |               |               |               |                                                                                                                                                                                              |               |
| <p>Zhang et al.</p> <p>Sep 2021</p> <p>[24]</p> | <p>Prospective</p> <p>October 2018 – November 2020</p> | AIS | <p>NETs</p> <p>Cf-DNA</p> <p>MPO</p> <p>NE</p> <p>Not mentioned</p> | <p><u>Group 1:</u></p> <p>Healthy controls</p> <p><math>n = 12</math></p> <p>mean age = <math>35.07 \pm 0.5</math></p> <p><u>Group 2:</u> Patients with asymptomatic carotid stenosis</p> <p><math>n = 13</math></p> <p>mean age = <math>35.57 \pm 4.0</math></p> <p><u>Group 3:</u> Patients with symptomatic carotid stenosis</p> <p><math>n = 12</math></p> <p>mean age = <math>43.63 \pm 0.5</math></p> | Not mentioned | Blood samples | Not mentioned | <p>NETs markers levels in plasma were higher in patients with symptomatic carotid stenosis compared with the healthy controls and asymptomatic patients.</p> <p><math>p &lt; 0.05</math></p> | Not mentioned |

|                                |                                                                                   |      |                                                                                 |                                                                                                                                                                                                                                                                                                                                                                                                                                                                                                                                                                                    |                                                                                    |                     |                |                                                                                                                                                                                                                                                                                                                                                                   |                   |
|--------------------------------|-----------------------------------------------------------------------------------|------|---------------------------------------------------------------------------------|------------------------------------------------------------------------------------------------------------------------------------------------------------------------------------------------------------------------------------------------------------------------------------------------------------------------------------------------------------------------------------------------------------------------------------------------------------------------------------------------------------------------------------------------------------------------------------|------------------------------------------------------------------------------------|---------------------|----------------|-------------------------------------------------------------------------------------------------------------------------------------------------------------------------------------------------------------------------------------------------------------------------------------------------------------------------------------------------------------------|-------------------|
| Orbán-Kálmándi et al. 2021 [9] | Prospective, observational, single-centered study<br><br>June 2017–September 2020 | sICH | Clot lysis assays<br>CLA and mCLA<br>(mimic the effect of NETs assay condition) | <p><u>Group 1:</u> Patients with non-traumatic intracerebral hemorrhage stroke<br/><math>n = 89</math><br/>mean age = 68 (<math>\pm 11.6</math>)</p> <p><b>Stratification by mortality rate</b></p> <p><u>Group 1a:</u> Survival by day 14<br/><math>n = 63</math><br/>mean age = 67 <math>\pm</math> 12</p> <p><u>Group 1b:</u><br/>Non-survival by day 14<br/><math>n = 26</math><br/>mean age = 71 <math>\pm</math> 10</p> <p><b>Stratification based on 3 months outcome</b></p> <p><u>Group 1a:</u> mRS 0–1<br/><math>n = 15</math><br/>mean age = 64 <math>\pm</math> 12</p> | NIHSS (on admission and day 7)<br><br>ICH score<br><br>mRS (3 months after stroke) | Venous blood sample | upon admission | <p>Severe stroke (NIHSS&gt;10) patients presented significantly shorter clot lysis times in the presence of DNA and histone as compared to patients with NIHSS&lt;10.</p> <p><math>p = 0.032</math></p> <p>Shorter clot lysis times were significantly associated with higher mortality in day 14 and worse functional outcomes</p> <p><math>p = 0.027</math></p> | Small sample size |
|--------------------------------|-----------------------------------------------------------------------------------|------|---------------------------------------------------------------------------------|------------------------------------------------------------------------------------------------------------------------------------------------------------------------------------------------------------------------------------------------------------------------------------------------------------------------------------------------------------------------------------------------------------------------------------------------------------------------------------------------------------------------------------------------------------------------------------|------------------------------------------------------------------------------------|---------------------|----------------|-------------------------------------------------------------------------------------------------------------------------------------------------------------------------------------------------------------------------------------------------------------------------------------------------------------------------------------------------------------------|-------------------|

|                               |                                                 |     |                                 |                                                                                                                                                                                                    |                            |                                 |                                                                                                                            |                                                                                                                                                                                                                                                                 |                   |
|-------------------------------|-------------------------------------------------|-----|---------------------------------|----------------------------------------------------------------------------------------------------------------------------------------------------------------------------------------------------|----------------------------|---------------------------------|----------------------------------------------------------------------------------------------------------------------------|-----------------------------------------------------------------------------------------------------------------------------------------------------------------------------------------------------------------------------------------------------------------|-------------------|
|                               |                                                 |     |                                 | <u>Group 1b:</u><br>mRS 2–5<br>$n = 32$<br>mean age = $67 \pm 13$<br><u>Group 1c:</u><br>mRS 6<br>$n = 39$<br>male = 28 (72%)<br>mean age = $71 \pm 10$<br><br><u>Group 2:</u> Healthy<br>controls |                            |                                 |                                                                                                                            |                                                                                                                                                                                                                                                                 |                   |
| Genchi et al.<br>2021<br>[29] | Prospective<br><br>March 2016 –<br>January 2019 | AIS | citH3<br><br>MPO<br><br>MPO-DNA | LVO stroke patients,<br>treated with mt<br><br>$n = 115$<br><br>(80 had<br>retrieved cerebral<br>thrombi available)<br>median age: 74 years                                                        | NIHSS<br><br>mRS           | Thrombi<br><br>Peripheral blood | Thrombi:<br>During mechanical<br>thrombectomy<br><br>Peripheral blood:<br>At admission<br>within 24 h from<br>stroke onset | NET content was<br>significantly increased in<br>cardioembolic compared to<br>large artery atherosclerosis<br>thrombi<br><br>$p = 0.04$<br><br>NET content in the thrombus<br>was<br>found to correlate with NET<br>content in the plasma<br><br>$p \leq 0.001$ | Not mentioned     |
| Chen et al.<br>2021<br>[12]   | Prospective<br><br>November<br>2018 –           | IS  | H3Cit                           | AIS patients<br>undergone MT<br><br>$n = 30$<br>mean age: 70                                                                                                                                       | NIHSS<br>TICI score<br>mRS | Thrombi sample                  | During mechanical<br>thrombectomy                                                                                          | NETs are present in the clots<br>of patients with LVOS                                                                                                                                                                                                          | Small sample size |

|                            |                                                                 |     |                                                                                 |                                                                                                                      |       |               |         |                                                                                                                                                                                                                                                                  |                                                                                                                                                                                                                                                                                                            |
|----------------------------|-----------------------------------------------------------------|-----|---------------------------------------------------------------------------------|----------------------------------------------------------------------------------------------------------------------|-------|---------------|---------|------------------------------------------------------------------------------------------------------------------------------------------------------------------------------------------------------------------------------------------------------------------|------------------------------------------------------------------------------------------------------------------------------------------------------------------------------------------------------------------------------------------------------------------------------------------------------------|
|                            | November<br>2019                                                |     |                                                                                 |                                                                                                                      |       |               |         |                                                                                                                                                                                                                                                                  | <p>Significant heterogeneity between patients</p> <p>Selection bias wherein clot samples are only available in patients who had at least partial success in clot removal.</p> <p>Selection bias for techniques wherein the clot could be preserved such as stentriever as opposed to aspiration alone.</p> |
| Lin et al.<br>2021<br>[36] | Retrospective cohort analyses<br><br>April 2006 – December 2019 | AIS | <p>Histone/DNA complex</p> <p>Citrullinated histone H3</p> <p>Cell-free DNA</p> | <p>iTTP patients who had ischemic strokes</p> <p><math>n = 21</math></p> <p>mean age: <math>49.9 \pm 10.9</math></p> | NIHSS | Blood samples | Unknown | <p>Comparison between patients with large ischemic strokes (<math>n = 10</math>) and small ischemic strokes (<math>n = 11</math>) revealed that patients with small stroke were older (<math>p = 0.043</math>) and had higher plasma levels of citrullinated</p> | <p>Exact timing variable</p> <p>No detailed analysis of potential confounders, including TOAST, stroke subtype criteria, and location of the small AIS.</p>                                                                                                                                                |



|                             |                                  |     |                 |                                                                                                                                                                                                               |               |              |                                |                                                                                                                                                                                                                                                                                                                                                                                                      |                      |
|-----------------------------|----------------------------------|-----|-----------------|---------------------------------------------------------------------------------------------------------------------------------------------------------------------------------------------------------------|---------------|--------------|--------------------------------|------------------------------------------------------------------------------------------------------------------------------------------------------------------------------------------------------------------------------------------------------------------------------------------------------------------------------------------------------------------------------------------------------|----------------------|
|                             |                                  |     |                 |                                                                                                                                                                                                               |               |              |                                | histone 3 ( $p = 0.006$ ) and histone/DNA complex ( $p = 0.014$ ) than those with large strokes.                                                                                                                                                                                                                                                                                                     | Limited sample size. |
| Deng et al.<br>2020<br>[26] | Prospective<br><br>Not mentioned | AIS | H3cit<br><br>NE | Ischemic stroke patients $n = 46$<br><br><u>Group 1:</u><br>Diabete mellitus (DM)<br>$n = 9$<br><br><u>Group 2:</u><br>hyperglycemia (HG)<br>$n = 9$<br><br><u>Group 3:</u><br>normoglycemic (NG)<br>$n = 28$ | Not mentioned | Thrombi      | During mechanical thrombectomy | NETs were observed in thrombi retrieved from ischemic stroke patients undergoing endovascular treatment.<br><br>Neutrophil elastase stained for the confirmation of neutrophils in the thrombus is shown.<br><br>Citruillinated histone H3 content was relatively low in the normoglycemic stroke patients, while it was more variable and much higher in diabetic and acute hyperglycemic patients. | Not mentioned        |
| Essig et al.<br>2020        | Prospective                      | AIS | NE              | AIS of the middle cerebral artery                                                                                                                                                                             | NIHSS score   | Thrombemboli | During MT                      | The number of neutrophils                                                                                                                                                                                                                                                                                                                                                                            | Not mentioned        |

|                         |                                                                                                  |     |                                  |                                                                                                                                                      |                                                                                        |         |                                  |                                                                                                                                                                                                                                                                                                                                                                                                          |                                                                                 |
|-------------------------|--------------------------------------------------------------------------------------------------|-----|----------------------------------|------------------------------------------------------------------------------------------------------------------------------------------------------|----------------------------------------------------------------------------------------|---------|----------------------------------|----------------------------------------------------------------------------------------------------------------------------------------------------------------------------------------------------------------------------------------------------------------------------------------------------------------------------------------------------------------------------------------------------------|---------------------------------------------------------------------------------|
| [32]                    | Not mentioned                                                                                    |     | H3Cit<br><br>MPO<br><br>DNA      | (MCA), internal carotid artery (ICA) or basilar artery patients undergone successful MT<br><br>$n = 37$<br>mean age = 63 (56–77)                     | (Median on admission 17 (13–22) and on discharge 8 (4–10))<br><br>TOAST<br><br>ASPECTS |         |                                  | was associated with stroke severity as assessed by the NIHSS upon admission ( $p = 0.09$ ) and discharge ( $p = 0.07$ )<br><br>Neutrophil numbers were higher in thrombemboli of presumed cardioembolic origin and in thrombemboli of cryptogenic origin compared to non-cardioembolic thrombemboli<br><br>Older thrombemboli (>1 day) contain more neutrophils than fresh thrombemboli ( $p = 0.0002$ ) |                                                                                 |
| Novotny et al 2020 [20] | Prospective<br><br>June 2005 – December 2013 (patients with AMI)<br><br>October 2010 – September | AIS | NE<br>H3cit<br>Extracellular DNA | AIS patients with anterior circulation stroke undergone MT<br><br><u>Group 1:</u><br>Patients with AIS<br><br>$n = 71$<br>mean age = $69.9 \pm 13.8$ | NIHSS<br><br>mRS<br><br>TICI<br>Score<br><br>TOAST classification                      | Thrombi | During mechanical recanalization | Amounts of neutrophils ( $p = 0.56$ ) were similar between AIS and AMI thrombi.<br><br>NETs were present in 100% of patients with AIS and 20.8% of patients with AMI.                                                                                                                                                                                                                                    | Only patients with successful thrombus aspiration were eligible for enrollment. |

|  |                     |  |  |                                                                                                                                                  |  |  |  |                                                                                                                                                                                                                                                                                                                                                                                                                                                                                                                                      |  |
|--|---------------------|--|--|--------------------------------------------------------------------------------------------------------------------------------------------------|--|--|--|--------------------------------------------------------------------------------------------------------------------------------------------------------------------------------------------------------------------------------------------------------------------------------------------------------------------------------------------------------------------------------------------------------------------------------------------------------------------------------------------------------------------------------------|--|
|  | 2012 (AIS patients) |  |  | <p><u>Group 2:</u><br/>Patients with AMI<br/>(Acute Myocardial Infarction)<br/><math>n = 72</math><br/>mean age = <math>61.5 \pm 10.9</math></p> |  |  |  | <p>Thrombi classified as TOAST-1 presented fewer NETs (<math>p = 0.0476</math>) and less netting neutrophils (<math>p = 0.0184</math>) compared with TOAST-2 patients.</p> <p>In thrombi classified as TOAST-5, more NETs were present compared with TOAST-1 (<math>p = 0.0485</math>)</p> <p>NETs were associated with interventional markers representing thrombus stability and with worse clinical outcome based on the NIHSS post-assessment score (<math>p = 0.0003</math>) and mRS until 90 days (<math>p = 0.006</math>)</p> |  |
|--|---------------------|--|--|--------------------------------------------------------------------------------------------------------------------------------------------------|--|--|--|--------------------------------------------------------------------------------------------------------------------------------------------------------------------------------------------------------------------------------------------------------------------------------------------------------------------------------------------------------------------------------------------------------------------------------------------------------------------------------------------------------------------------------------|--|

|                             |                                                  |     |                                                       |                                                                                                                                                                                                                                                                                                                                                                                                                      |                                 |                                                                         |                                 |                                                                                                                                                                                                                                                                                                                                                                                                                                                                                                                                              |                                                                                      |
|-----------------------------|--------------------------------------------------|-----|-------------------------------------------------------|----------------------------------------------------------------------------------------------------------------------------------------------------------------------------------------------------------------------------------------------------------------------------------------------------------------------------------------------------------------------------------------------------------------------|---------------------------------|-------------------------------------------------------------------------|---------------------------------|----------------------------------------------------------------------------------------------------------------------------------------------------------------------------------------------------------------------------------------------------------------------------------------------------------------------------------------------------------------------------------------------------------------------------------------------------------------------------------------------------------------------------------------------|--------------------------------------------------------------------------------------|
| Lim et al.<br>2020<br>[13]  | Prospective<br><br>October 2017 –<br>August 2018 | AIS | DNA-histone<br>complex<br><br>dsDNA<br><br>Neutrophil | <p><u>Group 1:</u><br/>Patients newly<br/>diagnosed with ACS<br/>(acute coronary<br/>syndrome)<br/><math>n = 37</math><br/>mean age = <math>67.1 \pm 10.1</math></p> <p><u>Group 2:</u><br/>Patients newly<br/>diagnosed with AIS<br/><math>n = 58</math><br/>mean age = <math>68.2 \pm 11.3</math></p> <p><u>Group 3:</u><br/>Healthy controls<br/><math>n = 25</math><br/>mean age = <math>66.4 \pm 7.1</math></p> | NIHSS                           | Residual blood<br>samples without<br>any additional<br>blood collection | Not mentioned                   | <p>Concentrations of dsDNA<br/>were statistically higher in<br/>patients with ACS<br/>or AIS than those in the<br/>control group <math>p &lt; 0.001</math></p> <p>In the univariable and<br/>multivariable analyses,<br/>statistically significant risk<br/>factors were <b>troponin I (TnI)</b><br/><b>level</b> and<br/><b>dsDNA concentration</b> in the<br/>ACS group<br/>(<math>p = 0.046</math><br/><math>p = 0.015</math> respectively)<br/>and only<br/><b>dsDNA concentration</b> in the<br/>AIS group (<math>p = 0.002</math>)</p> | <p>Relatively small sample<br/>size</p> <p>Sampling in different<br/>time points</p> |
| Zhou et al.<br>2021<br>[35] | Prospective<br>April 2017 –<br>March 2019        | AIS | MPO-DNA<br><br>NE-DNA<br><br>H3Cit-DNA<br><br>cfDNA   | <p><u>Group 1:</u><br/>AIS patients with<br/>acute ICA occlusion<br/>who had undergone<br/>endovascular<br/>thrombectomy<br/><math>n = 55</math></p>                                                                                                                                                                                                                                                                 | NIHSS<br><br>mRs<br><br>ASPECTS | Arterial blood<br>samples<br><br>Thrombi                                | Healthy controls:<br>during DSA | <p>NET-specific markers were<br/>elevated on the plasma from<br/>carotid artery relative to<br/>plasma from the aorta or<br/>controls<br/><math>p &lt; 0.01</math></p>                                                                                                                                                                                                                                                                                                                                                                       | Not mentioned                                                                        |

|                            |                                                          |     |                                                                                                                                                                             |                                                                                                                                                                                                                                                                                                                  |       |                  |                                      |                                                                                                                                                                                                                                                                                                                                                                                                                                                                                                               |               |
|----------------------------|----------------------------------------------------------|-----|-----------------------------------------------------------------------------------------------------------------------------------------------------------------------------|------------------------------------------------------------------------------------------------------------------------------------------------------------------------------------------------------------------------------------------------------------------------------------------------------------------|-------|------------------|--------------------------------------|---------------------------------------------------------------------------------------------------------------------------------------------------------------------------------------------------------------------------------------------------------------------------------------------------------------------------------------------------------------------------------------------------------------------------------------------------------------------------------------------------------------|---------------|
|                            |                                                          |     |                                                                                                                                                                             | mean age = 65.35 ± 11.5<br><br><u>Group 2:</u><br>Healthy controls<br>$n = 35$<br>mean age = 61.44 ± 9.89                                                                                                                                                                                                        |       |                  |                                      |                                                                                                                                                                                                                                                                                                                                                                                                                                                                                                               |               |
| Cai et al.<br>2019<br>[34] | Prospective<br><br>1 January 2014<br>– 10 August<br>2018 | AIS | Neutrophil count<br><br>Neutrophil to<br>lymphocyte ratio<br>(NLR) in the<br>peripheral blood<br><br>Infarct sizes within<br>24h<br>after symptom<br>onset were<br>analyzed | <u>Group 1:</u> Patients<br>$n = 225$<br>mean age 64.87 ± 0.60<br><br><u>Group 1a:</u> Patients<br>who<br>had infection<br>$n = 58$<br><br><u>Group 1b:</u> Patients<br>who<br>had not infection<br>$n = 167$<br><br><u>Group 2:</u><br>Healthy controls $n = 56$<br>age and gender-<br>matched with<br>patients | NIHSS | Peripheral blood | Within 24h<br>after symptom<br>onset | Higher neutrophils and<br>neutrophil to<br>lymphocyte ratio (NLR) in<br>AIS patients<br>with or without infection<br>compared to controls<br><b>(<math>p \leq 0.001</math>)</b><br><br>In AIS patients without<br>infection, NLR,<br>was positively correlated<br>with higher NIHSS scores<br><b>(<math>p = 0.0006</math>)</b><br><br>In patients with<br>infarction > 1.5cm, both<br>neutrophil counts ( $p = 0.0208$ )<br>and NLR ( $p = 0.0447$ )<br>positively correlated with<br>patients' infarct sizes | Not mentioned |

|                               |                                                  |     |                                                                        |                                                                                                                                                                                                                                                                                                                                                                                                                                                        |               |              |                                                                    |                                                                                                                                                                                                                                                                                                                                   |                                                                                                                                                         |
|-------------------------------|--------------------------------------------------|-----|------------------------------------------------------------------------|--------------------------------------------------------------------------------------------------------------------------------------------------------------------------------------------------------------------------------------------------------------------------------------------------------------------------------------------------------------------------------------------------------------------------------------------------------|---------------|--------------|--------------------------------------------------------------------|-----------------------------------------------------------------------------------------------------------------------------------------------------------------------------------------------------------------------------------------------------------------------------------------------------------------------------------|---------------------------------------------------------------------------------------------------------------------------------------------------------|
|                               |                                                  |     |                                                                        |                                                                                                                                                                                                                                                                                                                                                                                                                                                        |               |              |                                                                    |                                                                                                                                                                                                                                                                                                                                   |                                                                                                                                                         |
| Bang et al.<br>2019<br>[10]   | Prospective<br>cohort study<br><br>Not mentioned | AIS | Plasma DNA<br>(CD62P)<br><br>Neutrophil<br>( $\times 10^3/\text{mL}$ ) | <p><u>Group 1:</u><br/>cancer-related stroke<br/><math>n = 38</math><br/>mean age = <math>65.4 \pm 10.3</math></p> <p><u>Group 2:</u><br/>healthy controls<br/><math>n = 33</math><br/>mean age = <math>56.3 \pm 9.4</math></p> <p><u>Group 3:</u> cancer<br/>controls<br/><math>n = 27</math><br/>mean age = <math>57 \pm 9.9</math></p> <p><u>Group 4:</u> stroke<br/>controls<br/><math>n = 40</math><br/>mean age = <math>72.6 \pm 10.4</math></p> | Not mentioned | Blood sample | 7 days after acute stroke due to embolic stroke of unknown sources | In multiple regression analyses, increased plasma DNA levels were associated with cancer-related stroke (odds ratio = 11.65 for the highest quartile; 95% CI, 3.199–42.46) and D-dimer levels of $\geq 2 \mu\text{g/mL}$ (odds ratio = 19.09 for highest quartile; 95% CI, 4.143–87.95) after adjusting for possible confounders. | Small sample size<br><br>Need for long follow-up study among cancer-related stroke patients<br><br>Association of NETs with cancer-unrelated thrombosis |
| Farkas et al.<br>2019<br>[18] | Prospective<br><br>2014–2016                     | AIS | Extracellular DNA<br><br>H3cit                                         | <p><u>Group 1:</u><br/>AIS patients<br/><math>n = 78</math></p> <p><u>Group 2:</u></p>                                                                                                                                                                                                                                                                                                                                                                 | Not mentioned | Thrombi      | During acute therapeutic catheter interventions in CAD, open       | Extracellular DNA content of AIS thrombi is similar to CAD and 2.5-fold lower than in PAD thrombi, $p = 0.013$                                                                                                                                                                                                                    | Heterogeneity of thrombi, especially if we consider the old age of some peripheral clots                                                                |

|                                        |                                           |            |                                        |                                                                                                                                                                                                                                         |                                                           |                      |                                                                    |                                                                                                                                                                                                                                                                                                                                                                                                                                                                                                                                       |                                                                                                                                                                                               |
|----------------------------------------|-------------------------------------------|------------|----------------------------------------|-----------------------------------------------------------------------------------------------------------------------------------------------------------------------------------------------------------------------------------------|-----------------------------------------------------------|----------------------|--------------------------------------------------------------------|---------------------------------------------------------------------------------------------------------------------------------------------------------------------------------------------------------------------------------------------------------------------------------------------------------------------------------------------------------------------------------------------------------------------------------------------------------------------------------------------------------------------------------------|-----------------------------------------------------------------------------------------------------------------------------------------------------------------------------------------------|
|                                        |                                           |            |                                        | <p>CAD patients<br/><math>n = 66</math></p> <p><u>Group 3:</u><br/>PAD patients <math>n = 64</math></p> <p>Age not mentioned</p>                                                                                                        |                                                           |                      | <p>surgery in PAD, or<br/>via stent-retriever<br/>thrombectomy</p> | <p>No difference was observed<br/>between H3cit content at<br/>different vascular locations.</p> <p>The NET content of thrombi<br/>correlated parabolically with<br/>systemic inflammatory<br/>markers and positively with<br/>patients' age.</p>                                                                                                                                                                                                                                                                                     | <p>Numerous factors may<br/>affect<br/>thrombus structure,<br/>and thus it is hard to<br/>evaluate the effects of<br/>only<br/>one isolated<br/>determinant</p>                               |
| <p>Arroyo et al.<br/>2018<br/>[37]</p> | <p>Prospective<br/><br/>Not mentioned</p> | <p>AIS</p> | <p>cfDNA<br/><br/>NE plasma levels</p> | <p><u>Group 1:</u><br/>Steadily<br/>anticoagulated atrial<br/>fibrillation patients<br/><math>n = 336</math><br/>median age = 69</p> <p><u>Group 2:</u><br/>Healthy controls<br/><math>n = 100</math><br/>median age = 54<br/>years</p> | <p>CHA2DS2-VASc<br/>score</p> <p>CHA2DS2-<br/>VASc+NE</p> | <p>Blood samples</p> | <p>upon admission</p>                                              | <p>cfDNA of <math>54.4 \pm 1.95</math> ng/mL.<br/>was significantly<br/>higher in the plasma of AF<br/>patients compared to<br/>controls<br/>(<math>p &lt; 0.001</math>)</p> <p>NE level <math>&gt; 55.29</math> ng/mL was<br/>associated with a higher risk<br/>of all-cause mortality (<math>p &lt;</math><br/><b>0.001</b>), cardiovascular<br/>mortality<br/>(<math>p = 0.020</math>), composite<br/>cardiovascular events (<math>p =</math><br/><b>0.005</b>), and ischemic stroke (<math>p</math><br/><math>= 0.009</math>)</p> | <p>Single center,<br/>population</p> <p>All AF patients had<br/>good anticoagulation<br/>control =&gt; results<br/>should only be<br/>extrapolated to<br/>clinically similar<br/>patients</p> |

|                          |                                                     |     |                                                              |                                                                                                  |                                                           |         |                  |                                                                                                                                                                                                                                                                                                                                                                                                                                                                |               |
|--------------------------|-----------------------------------------------------|-----|--------------------------------------------------------------|--------------------------------------------------------------------------------------------------|-----------------------------------------------------------|---------|------------------|----------------------------------------------------------------------------------------------------------------------------------------------------------------------------------------------------------------------------------------------------------------------------------------------------------------------------------------------------------------------------------------------------------------------------------------------------------------|---------------|
|                          |                                                     |     |                                                              |                                                                                                  |                                                           |         |                  |                                                                                                                                                                                                                                                                                                                                                                                                                                                                |               |
| Ducroux et al. 2018 [16] | Prospective<br><br>December 2015<br>– December 2016 | AIS | Extracellular DNA<br><br>MPO<br><br>NE activity<br><br>H3Cit | AIS patients treated with endovascular therapy<br><br>$n = 108$<br><br>mean age = $69 \pm 15.83$ | NIHSS score<br><br>TICI score<br><br>TOAST classification | Thrombi | At the end of MT | <p>NETs were found in all 34 thrombi analyzed in histology.</p> <p>There was no significant correlation between NETs content and stroke pathogenesis, 3-month functional outcome, or final Thrombolysis in Cerebral Infarction (TICI) score</p> <p>NETs content is associated with endovascular procedure length and device number of passes.</p> <p>tPA and DNase 1 coadministration accelerates ex vivo thrombolysis compared with tPA or DNase 1 alone.</p> | Not mentioned |



|                              |                                  |     |                    |                                                                                                                                                                                                                                              |                  |                  |                                                                                                                                       |                                                                                                                                                                                                                                                                                                                                                                                                                                                                                                                                                                                                                                                                                                                                                                                                                                                                                                           |               |
|------------------------------|----------------------------------|-----|--------------------|----------------------------------------------------------------------------------------------------------------------------------------------------------------------------------------------------------------------------------------------|------------------|------------------|---------------------------------------------------------------------------------------------------------------------------------------|-----------------------------------------------------------------------------------------------------------------------------------------------------------------------------------------------------------------------------------------------------------------------------------------------------------------------------------------------------------------------------------------------------------------------------------------------------------------------------------------------------------------------------------------------------------------------------------------------------------------------------------------------------------------------------------------------------------------------------------------------------------------------------------------------------------------------------------------------------------------------------------------------------------|---------------|
| Valles et al.<br>2017<br>[3] | Prospective<br><br>Not Mentioned | AIS | cfDNA<br><br>citH3 | <p><u>Group 1:</u><br/>AIS patients<br/><math>n = 243</math> (follow up<br/>one year after<br/>hospital discharge<br/>179)<br/>mean age = <math>70.7 \pm 12.2</math></p> <p><u>Group 2:</u><br/>Healthy controls<br/><math>n = 27</math></p> | NIHSS<br><br>mRS | Peripheral blood | <p>Patients: within<br/>the first 72 h after<br/>the onset of the<br/>acute event</p> <p>Healthy controls:<br/>after a night fast</p> | <p>levels of <b>H3cit</b> in AIS<br/>patients (<math>0.080 \pm 0.002</math> [0.040–<br/>0.284] <math>p &lt; 0.0001</math>, <b>cfDNA</b><br/>(<math>432.11 \pm 9.95</math> [145.6–1227.5],<br/><math>p &lt; 0.0001</math>, and <b>nucleosomes</b><br/>(<math>0.329 \pm 0.015</math> [0.07–1.87] <math>p =</math><br/><b>0.002</b> were significantly<br/>higher than in controls<br/>Positive correlation between<br/>age and citH3 only. cfDNA<br/>levels were slightly higher in<br/>women (<math>p = 0.047</math>).</p> <p>All three markers of NETs<br/>were significantly elevated<br/>in patients with a history of<br/>AF</p> <p>Positive correlation between<br/>NIHSS score at onset and the<br/>levels of all three NET<br/>markers. When patients were<br/>stratified according to NIHSS<br/>score at onset (<math>&lt;14</math> or <math>\geq 14</math>),<br/>those with higher scores had</p> | Not Mentioned |
|------------------------------|----------------------------------|-----|--------------------|----------------------------------------------------------------------------------------------------------------------------------------------------------------------------------------------------------------------------------------------|------------------|------------------|---------------------------------------------------------------------------------------------------------------------------------------|-----------------------------------------------------------------------------------------------------------------------------------------------------------------------------------------------------------------------------------------------------------------------------------------------------------------------------------------------------------------------------------------------------------------------------------------------------------------------------------------------------------------------------------------------------------------------------------------------------------------------------------------------------------------------------------------------------------------------------------------------------------------------------------------------------------------------------------------------------------------------------------------------------------|---------------|

|                         |                                  |     |                 |                                                                          |                                                    |         |                               |                                                                                                                                                                                                                                                                                                                                                                                                                                                                                                |                                                                                                 |
|-------------------------|----------------------------------|-----|-----------------|--------------------------------------------------------------------------|----------------------------------------------------|---------|-------------------------------|------------------------------------------------------------------------------------------------------------------------------------------------------------------------------------------------------------------------------------------------------------------------------------------------------------------------------------------------------------------------------------------------------------------------------------------------------------------------------------------------|-------------------------------------------------------------------------------------------------|
|                         |                                  |     |                 |                                                                          |                                                    |         |                               | <p>significantly higher levels of all three NETs [citH3 (<math>p = 0.000</math>), cfDNA (<math>p = 0.017</math>), and nucleosomes (<math>p = 0.05</math>)</p> <p>At discharge, the levels of all three NET markers were positively correlated with the NIHSS score.</p> <p>Levels of cfDNA and CitH3 were higher in the patients with cardioembolic stroke.</p> <p>Patients who died at one-year clinical follow-up from all causes had significantly higher citH3 at onset than survivors</p> |                                                                                                 |
| Laridan et al.2017 [40] | Prospective<br><br>Not mentioned | AIS | H3cit<br><br>NE | <u>Group 1:</u><br>Ischemic stroke patients after thrombectomy procedure | NIHSS at admission and discharge<br>TOAST criteria | Thrombi | During thrombectomy procedure | <p>abundant presence of NETs in ischemic stroke thrombi</p> <p>Older thrombi (&gt;1 day) contained significantly</p>                                                                                                                                                                                                                                                                                                                                                                           | Only thrombi that did not dissolve spontaneously or after t-PA administration and that could be |

|  |  |  |  |                                                                                                                                                                                                                          |  |  |  |                                                                                                                                                                                                                                                                                                                                                                                                                                                                                                                                                                                                                     |                                                                                                                                                                                                     |
|--|--|--|--|--------------------------------------------------------------------------------------------------------------------------------------------------------------------------------------------------------------------------|--|--|--|---------------------------------------------------------------------------------------------------------------------------------------------------------------------------------------------------------------------------------------------------------------------------------------------------------------------------------------------------------------------------------------------------------------------------------------------------------------------------------------------------------------------------------------------------------------------------------------------------------------------|-----------------------------------------------------------------------------------------------------------------------------------------------------------------------------------------------------|
|  |  |  |  | <p><math>n = 68</math><br/>mean age = <math>69.1 \pm 18.3</math></p> <p><u>Group 1a:</u> fresh thrombi (&lt;1 day)<br/><math>n = 32</math></p> <p><u>Group 1b:</u> older thrombi (&gt;1 day)<br/><math>n = 36</math></p> |  |  |  | <p>higher amounts of neutrophils compared to fresh thrombi (&lt;1 day) (<math>p &lt; 0.001</math>)</p> <p>Thrombi of cardioembolic origin contained nearly double the number of NETs (<math>3.07\% \pm 2.21\%</math>) compared to non-cardioembolic thrombi (<math>1.57\% \pm 1.23\%</math>) (<math>p &lt; 0.05</math>)</p> <p>Older thrombi showed significantly higher amounts of H3Cit compared to fresh thrombi (<math>3.23\% \pm 2.76\%</math> versus <math>2.03\% \pm 1.63\%</math>) (<math>p &lt; 0.05</math>)</p> <p>DNase 1 can promote ex vivo stroke thrombus dissolution (<math>p &lt; 0.01</math>)</p> | <p>successfully retrieved via thrombectomy were available for study</p> <p>Low number of patients with non-cardioembolic stroke does not allow for robust conclusions regarding stroke etiology</p> |
|--|--|--|--|--------------------------------------------------------------------------------------------------------------------------------------------------------------------------------------------------------------------------|--|--|--|---------------------------------------------------------------------------------------------------------------------------------------------------------------------------------------------------------------------------------------------------------------------------------------------------------------------------------------------------------------------------------------------------------------------------------------------------------------------------------------------------------------------------------------------------------------------------------------------------------------------|-----------------------------------------------------------------------------------------------------------------------------------------------------------------------------------------------------|

|                               |                                                                                             |     |                           |                                                                                                                                                                                                                                                                                                                                                                                                                                                                                                                                                                                       |       |                                                                                 |                                 |                                                                                                                                                                                                                                                                                                                                                                                                                                                                                                      |                   |
|-------------------------------|---------------------------------------------------------------------------------------------|-----|---------------------------|---------------------------------------------------------------------------------------------------------------------------------------------------------------------------------------------------------------------------------------------------------------------------------------------------------------------------------------------------------------------------------------------------------------------------------------------------------------------------------------------------------------------------------------------------------------------------------------|-------|---------------------------------------------------------------------------------|---------------------------------|------------------------------------------------------------------------------------------------------------------------------------------------------------------------------------------------------------------------------------------------------------------------------------------------------------------------------------------------------------------------------------------------------------------------------------------------------------------------------------------------------|-------------------|
| Thålin et al.<br>2016<br>[17] | Prospective,<br>observational<br>case-control<br>study<br><br>April 2012 –<br>December 2014 | AIS | cfDNA<br><br>MPO<br>H3Cit | <p><u>Group 1:</u><br/>Patients with<br/>ischemic stroke and<br/>hsTnT &gt; 40 ng/L (ref<br/>value &lt; 15 ng/L)<br/><math>n = 12</math></p> <p><u>Group 2:</u><br/>Patients with<br/>ischemic stroke and<br/>hsTnT ≤ 15<br/>ng/L as <b>control</b><br/><b>patients</b> <math>n = 19</math></p> <p><u>Group 3:</u><br/>Healthy volunteers<br/>matched on sex and<br/>age within a five-<br/>year interval, were<br/>recruited as<br/>references for<br/>plasma analyses.<br/><math>n = 10</math></p> <p><u>Group 4:</u><br/>Patients with<br/>elevated hsTnT and<br/>malignancies</p> | NIHSS | Blood samples<br><br>Autopsy and<br>histopathology<br><br>(Group 4<br>patients) | Within two days<br>of admission | <p>A procoagulant state and an<br/>increase of the NET-specific<br/>marker citrullinated histone<br/>H3 (H3Cit) were<br/>found in the plasma of<br/>patients with elevated hsTnT<br/>compared to patients with<br/>normal levels, <math>p &lt; 0.001</math></p> <p>Plasma analyses in cancer<br/>patients showed even higher<br/>H3Cit levels (<math>p &lt; 0.001</math>), and<br/>an increase in granulocyte<br/>colony-stimulating factor,<br/>known to prime neutrophils<br/>towards NETosis.</p> | Small sample size |
|-------------------------------|---------------------------------------------------------------------------------------------|-----|---------------------------|---------------------------------------------------------------------------------------------------------------------------------------------------------------------------------------------------------------------------------------------------------------------------------------------------------------------------------------------------------------------------------------------------------------------------------------------------------------------------------------------------------------------------------------------------------------------------------------|-------|---------------------------------------------------------------------------------|---------------------------------|------------------------------------------------------------------------------------------------------------------------------------------------------------------------------------------------------------------------------------------------------------------------------------------------------------------------------------------------------------------------------------------------------------------------------------------------------------------------------------------------------|-------------------|

|                               |                                                                              |      |                                   |                                                                                                                                                                                                                                                                                                                                                    |                                              |                  |                                      |                                                                                                                                                                                                                                                                                                    |                                                                                                                                                                                                  |
|-------------------------------|------------------------------------------------------------------------------|------|-----------------------------------|----------------------------------------------------------------------------------------------------------------------------------------------------------------------------------------------------------------------------------------------------------------------------------------------------------------------------------------------------|----------------------------------------------|------------------|--------------------------------------|----------------------------------------------------------------------------------------------------------------------------------------------------------------------------------------------------------------------------------------------------------------------------------------------------|--------------------------------------------------------------------------------------------------------------------------------------------------------------------------------------------------|
|                               |                                                                              |      |                                   | revealed widespread<br>arterial H3Cit-<br>positive<br>Microthrombosis<br><br>$n = 3$                                                                                                                                                                                                                                                               |                                              |                  |                                      |                                                                                                                                                                                                                                                                                                    |                                                                                                                                                                                                  |
| Kitano et al.<br>2021<br>[39] | Multicenter<br>retrospective<br>study<br><br>January 2015 –<br>December 2019 | AIS  | Citrullinated<br>histone H3       | AIS patients<br>undergone MT, $n =$<br>54<br><u>Group 1:</u> Fresh<br>thrombus (<1 day)<br>$n = 43$ (23%)<br>mean age = 77 (67–84)<br><br><u>Group 2:</u><br>Older thrombi (>1<br>day) including lytic<br>thrombus (1–5 days)<br>$n = 131$ (71%) and<br>organized thrombus<br>(>5 days)<br>$n = 11$ (6%)<br>$n = 142$<br>mean age = 80 (70–<br>84) | mRs<br><br>NIHSS<br><br>ASPECTS<br><br>eTICI | Thrombi          | During mechanical<br>thrombectomy    | Older thrombi had greater<br>extent of NETosis ( $p = 0.006$ ).<br><br>More more device passes<br>before reperfusion were<br>necessary for older thrombi<br>( $p < 0.001$ ) and were<br>associated with poorer<br>functional outcomes<br>(adjusted common odds<br>ratio: 0.49; 95% CI: 0.24–0.99). | Patients with thrombi<br>unavailable for<br>evaluation were<br>excluded.<br><br>The exact timing of<br>thrombus content<br>ormation (primary or<br>possibly secondary<br>thrombi) was not clear. |
| Puy et al.<br>2021<br>[25]    | Post-Mortem<br>Study<br>2005–2019                                            | sICH | Myeloperoxidase<br><br>Histone H3 | sICH patients who<br>came to autopsy<br>within the first<br>month after stroke                                                                                                                                                                                                                                                                     | Not mentioned                                | Autopsy (brains) | Within 12 to 36<br>hours after death | Neutrophils were increased<br>in all cases ( $n = 14/14$ )<br>compared to control                                                                                                                                                                                                                  | Elderly patients and<br>sICH were<br>associated with<br>underlying cerebral                                                                                                                      |

|  |  |  |  |                                                                                                                                                                                                                                                                                                                                                         |  |  |  |                                                                                                                                                                                                                                                                                                                                                                                                                                                           |                                                                                                                                             |
|--|--|--|--|---------------------------------------------------------------------------------------------------------------------------------------------------------------------------------------------------------------------------------------------------------------------------------------------------------------------------------------------------------|--|--|--|-----------------------------------------------------------------------------------------------------------------------------------------------------------------------------------------------------------------------------------------------------------------------------------------------------------------------------------------------------------------------------------------------------------------------------------------------------------|---------------------------------------------------------------------------------------------------------------------------------------------|
|  |  |  |  | <p>onset<br/><math>n = 14</math><br/>median age = 78 (76–85)</p> <p>From stroke onset to time of death:</p> <p><u>Group 1:</u><br/>72 hours (<math>n = 2</math>)</p> <p><u>Group 2:</u><br/>4–7 days (<math>n = 4</math>)</p> <p><u>Group 3:</u><br/>8–15 days (<math>n = 5</math>)</p> <p><u>Group 4:</u><br/>&gt;15 days<br/>(<math>n = 3</math>)</p> |  |  |  | <p>contralateral sections in which no neutrophils were observed within the tissue, <math>p &lt; 0.0001</math></p> <p>NETs were found in 7/14 cases.</p> <p>Both neutrophils and NETs were detected within the hematoma but also, in the surrounding tissue.</p> <p>The appearance of neutrophils and NETs was time-dependent, following a two-wave pattern: during the first 72 hours and between 8–15 days after ICH onset. (<math>p = 0.016</math>)</p> | <p>amyloid angiopathy (CAA) in 13/14 cases</p> <p>Did not perform an exhaustive examination or quantification of the entire sICH lesion</p> |
|--|--|--|--|---------------------------------------------------------------------------------------------------------------------------------------------------------------------------------------------------------------------------------------------------------------------------------------------------------------------------------------------------------|--|--|--|-----------------------------------------------------------------------------------------------------------------------------------------------------------------------------------------------------------------------------------------------------------------------------------------------------------------------------------------------------------------------------------------------------------------------------------------------------------|---------------------------------------------------------------------------------------------------------------------------------------------|

#### Abbreviations:.

**ACS:** Acute Coronary Syndrome, **AIS:** Acute ischemic stroke, **AF:** atrial fibrillation, **aSAH:** aneurysmal subarachnoid hemorrhage, **CAD:** Coronary Artery Disease, **CLA:** Clot Lysis Assay, **cfDNA:** cell-free DNA **DCI:** Delayed cerebral ischemia, **EVT:** endovascular thrombectomy, **GCS:** Glasgow Coma Scale, **H3cit:** Citrullinated histone H3, **ICH:** intracerebral hemorrhage, **IQR:** interquartile ranges, **IS:** ischemic stroke, **iTTP:** immune Thrombotic Thrombopenic Porphyria, **IVT:** intravenous thrombolysis, **LDG:** Low-density granulocytes, **LVO:** large vessel occlusion, **MPO:** myeloperoxidase, **mRS:** modified Rankin Scale, **MT:** Mechanical Thrombectomy, **NE:** neutrophil elastase, **NETs:** neutrophil extracellular traps, **NIHSS:** National Institutes of Health Stroke Scale, **NLR:** neutrophil-to-lymphocyte ratio, **PAD:** Peripheral Artery Disease, **SAH:** subarachnoid hemorrhage, **sICH:** symptomatic intracerebral hemorrhage, **TIA:** transient ischemic attack, **TICI:** Thrombolysis in cerebral infarction, **TOAST:** Trial of Org 10172 in Acute Stroke Treatment.
